# Supplementary material for: Nickel Nanoparticles for Enhancing Carbon Capture
Source: Hindawi journal article supplement (doi:10.1155/2015/581785), 2015-01-01
Supplement: f1 [file 581785.f1.pdf]

# Nickel Nanoparticles for Enhancing Carbon Capture

Gaurav Ashok Bhaduri\*, Mohammed A.H. Alamiry and Lidija Šiller\*

School of Chemical Engineering and Advanced Materials, Newcastle University, Newcastle upon Tyne, NE1 7RU

## Supplementary Information

Curve fitting of CO<sub>2</sub> absorption in 50% potassium carbonate solution in presence and absence of NiNPs.

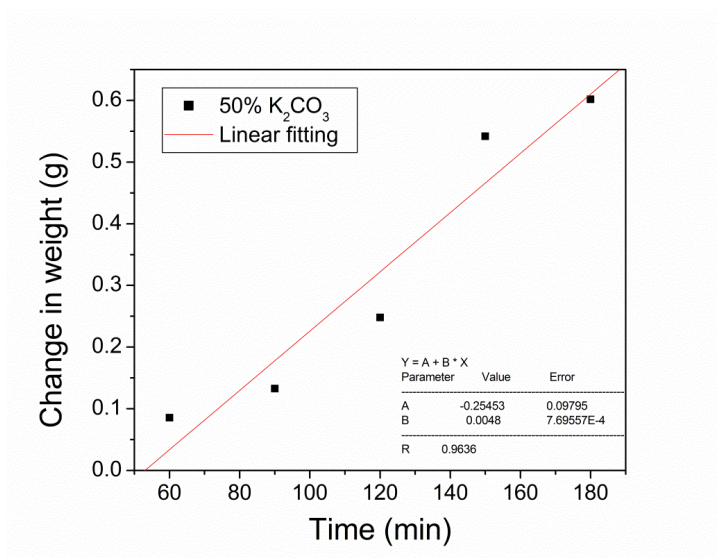

Figure S1: CO<sub>2</sub> absorption in 50% potassium carbonate solution using liner fit.

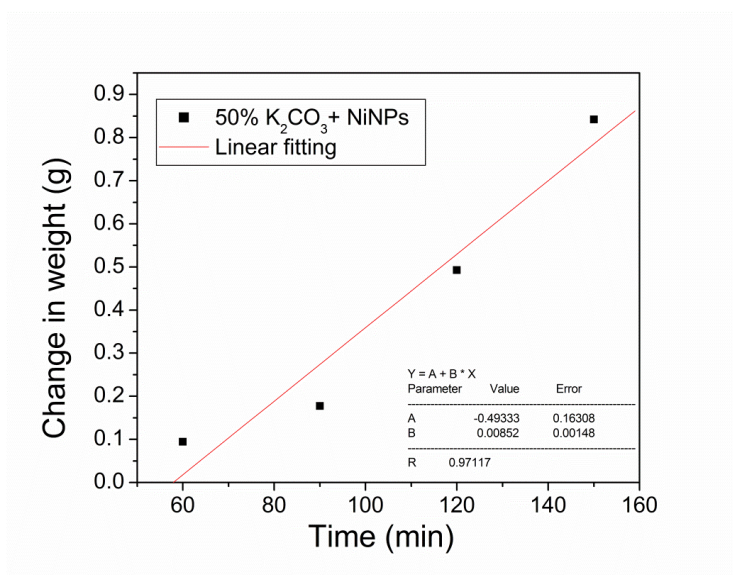

Figure S2: CO<sub>2</sub> absorption in 50% potassium carbonate solution in presence of NiNPs using liner fit.
